# Supplementary material for: Parental Traits Associated with Adherence to the Mediterranean Diet in Children and Adolescents in Croatia: A Cross-Sectional Study
Source: MDPI journal article supplement (doi:10.3390/nu14132598), 2022-06-23
Supplement: s1 [file s1]

**Table S1.** Results of univariate analyses for the relationships between parental socio-demographic characteristics and MD adherence and children's MD adherence.

| Variables                                      | KIDMED categories |              |              | <i>p</i> -value |
|------------------------------------------------|-------------------|--------------|--------------|-----------------|
|                                                | Low               | Average      | High         |                 |
| Mother's age, median (IQR)                     | 40.0 (8.0)        | 39.0 (7.0)   | 39.0 (8.0)   | 0.155           |
| Father's age, median (IQR)                     | 43.0 (7.0)        | 42.0 (8.0)   | 42.0 (9.0)   | 0.013           |
| Mother's BMI, median (IQR)                     | 23.05 (4.75)      | 22.51 (3.93) | 22.49 (3.85) | 0.003           |
| Father's BMI, median (IQR)                     | 27.40 (4.44)      | 26.87 (4.22) | 26.83 (4.22) | 0.003           |
| Mother's educational level, N (%)              |                   |              |              |                 |
| Primary school                                 | 7 (29.2)          | 13 (54.2)    | 4 (16.7)     | <0.001          |
| High school                                    | 253 (21.1)        | 720 (60.0)   | 227 (18.9)   |                 |
| Bachelor degree                                | 55 (19.6)         | 170 (60.5)   | 56 (19.9)    |                 |
| Master's degree                                | 137 (13.1)        | 664 (63.5)   | 244 (23.3)   |                 |
| PhD degree                                     | 2 (4.3%)          | 37 (78.7%)   | 8 (17%)      |                 |
| Father's educational level, N(%)               |                   |              |              |                 |
| Primary school                                 | 18 (41.9)         | 16 (37.2)    | 9 (20.9)     | <0.001          |
| High school                                    | 295 (19.5%)       | 920 (60.9)   | 295 (19.5)   |                 |
| Bachelor degree                                | 38 (14.8)         | 167 (65.2)   | 51 (19.9)    |                 |
| Master's degree                                | 85 (12.4)         | 437 (63.5)   | 166 (24.1)   |                 |
| PhD degree                                     | 8 (15.7)          | 34 (66.7)    | 9 (17.6)     |                 |
| Living with both parents                       |                   |              |              |                 |
| Yes                                            | 399 (16.9)        | 1467 (62.0)  | 499 (21.1)   | 0.018           |
| No                                             | 56 (24.1)         | 136 (58.6)   | 40 (17.2)    |                 |
| Employment status                              |                   |              |              |                 |
| Both parents employed                          | 341 (16.7)        | 1272 (62.2)  | 433 (21.2)   | 0.272           |
| One parent employed, the other unemployed      | 109 (21.2)        | 310 (60.3)   | 95 (18.5)    |                 |
| Both parents unemployed                        | 6 (19.4)          | 17 (548)     | 8 (25.8)     |                 |
| Number of children                             |                   |              |              |                 |
| 1                                              | 80 (18%)          | 269 (60.4%)  | 96 (21.6%)   | 0.680           |
| 2                                              | 226 (16.9%)       | 847 (63.3%)  | 266 (19.9%)  |                 |
| 3                                              | 121 (18.8%)       | 389 (60.5%)  | 133 (20.7%)  |                 |
| ≥ 4                                            | 36 (18.4%)        | 113 (57.7%)  | 47 (24%)     |                 |
| Household size                                 |                   |              |              |                 |
| 2                                              | 18 (25.4%)        | 41 (57.7)    | 12 (16.9)    | 0.158           |
| 3                                              | 82 (18.5)         | 264 (59.6)   | 97 (21.9)    |                 |
| 4                                              | 206 (16.5)        | 804 (64.3)   | 241 (19.3)   |                 |
| 5                                              | 113 (17.8)        | 389 (61.2)   | 134 (21.1)   |                 |
| 6                                              | 27 (19.6)         | 73 (52.9)    | 38 (27.5)    |                 |
| ≥ 7                                            | 9 (15.5)          | 33 (56.9)    | 16 (27.6)    |                 |
| Do finances limit your family in food choices? |                   |              |              |                 |
| Yes                                            | 121 (22.1%)       | 324 (59.1%)  | 103 (18.8%)  | 0.008           |
| No                                             | 336 (16.5%)       | 1271 (62.3%) | 434 (21.3%)  |                 |
| MEDAS categories for MD adherence              |                   |              |              |                 |
| Low                                            | 225 (31.3)        | 427 (59.4)   | 67 (9.3)     | <0.001          |
| Moderate                                       | 232 (13.4)        | 1098 (63.5)  | 400 (23.1)   |                 |
| High                                           | 6 (3.4)           | 93 (53.4)    | 75 (43.1)    |                 |
